# Supplementary material for: Phase-separated droplets swim to their dissolution
Source: PubMed Central journal article supplement (PMC11082165; doi:10.1038/s41467-024-47889-y), 2024-05-09
Supplement: 41467_2024_47889_MOESM2_ESM.pdf [file 41467_2024_47889_MOESM2_ESM.pdf]

**Title:** Supplementary Movie 1:

**Description:** Definition of the PEG-BSA phase separated system and experimental movies of active PEG-BSA droplets swimming towards each other on a PEGDA 12k coating.

**Title:** Supplementary Movie 2:

**Description:** Schematic of the gradient chamber and movies showing internal flows of passive PEG-BSA droplets in various external chemical gradients.

**Title:** Supplementary Movie 3:

**Description:** Movie of an active PEG-BSA droplet slowly dissolving.

**Title:** Supplementary Movie 4:

**Description:** Movies of passive PEG-BSA droplet swimming and dissolving in extreme external gradients.
